# Supplementary material for: Spatiotemporal Distribution of Tuberculosis in the Oromia Region of Ethiopia: Hotspot Analysis
Source: Preprints.org preprint supplement (doi:10.20944/preprints202308.0004.v1), 2023-08-01
Supplement: Supplementary file 1 [file supplementary]

**Supplementary**

**Table S1**: Variance inflation factors

| **Variables** | **VIF** |
| --- | --- |
| HIV Positivity Rate | 1.095 |
| Population density | 1.210 |
| Laboratory diagnostic coverage | 1.216 |
| Health Service coverage | 1.069 |
| Precipitation | 5.269 |
| Temperature | 3.492 |
| Wind Speed | 2.034 |
| Year | 1.001 |
| Humidity | 8.978 |

* Variables with VIF greater than six and above were excluded from the model

**Table S2:** Univariate model for notification of TB in the Oromia region of Ethiopia, 2018–2022

| **Independent variables in univariate Poisson regression*** | **TB Notification** | |
| --- | --- | --- |
| Coefficient | P-value |
| HIV Positivity Rate | 0.075896 | < 0.001 |
| Population density | 0.312771 | < 0.001 |
| Laboratory diagnostic coverage | 0.056826 | < 0.001 |
| Health Service coverage | 0.414084 | < 0.001 |
| Precipitation | -0.026815 | < 0.001 |
| Humidity | 0.023932 | < 0.001 |
| Temperature | 0.068449 | < 0.001 |
| Wind Speed | 0.090209 | < 0.001 |
| Year | -0.033156 | < 0.001 |

* For all univariate models, “*year*” was considered as a control variable

Table S3: Yearly and Quarterly (Seasonal) Notified TB Cases by Sex

| Year | Quarter/Season | Male | Female | Total TB Case |
| --- | --- | --- | --- | --- |
| 2018 | January - March | 5,040 | 4,437 | 9,477 |
| April - June | 5,174 | 4,266 | 9,440 |
| July - September | 5,381 | 4,285 | 9,666 |
| October - December | 5,785 | 4,873 | 10,658 |
| 2019 | January - March | 5,819 | 4,467 | 10,286 |
| April - June | 5,845 | 4,610 | 10,455 |
| July - September | 5,704 | 4,332 | 10,036 |
| October - December | 5,884 | 4,874 | 10,758 |
| 2020 | January - March | 5,851 | 4,959 | 10,810 |
| April - June | 4,433 | 3,565 | 7,998 |
| July - September | 5,150 | 4,099 | 9,249 |
| October - December | 6,035 | 4,908 | 10,943 |
| 2021 | January - March | 5,907 | 4,761 | 10,668 |
| April - June | 5,937 | 4,705 | 10,642 |
| July - September | 6,132 | 4,825 | 10,957 |
| October - December | 6,348 | 5,050 | 11,398 |
| 2022 | January - March | 6,856 | 5,592 | 12,448 |
| April - June | 6,918 | 5,409 | 12,327 |
| July - September | 5,285 | 4,013 | 9,298 |
| October - December | 4,974 | 3,790 | 8,764 |
| 2018 to 2022 | January - March | 28,307 | 22,555 | 50,862 |
| April - June | 29,473 | 24,216 | 53,689 |
| July - September | 27,652 | 21,554 | 49,206 |
| October - December | 29,026 | 23,495 | 52,521 |

**Table S4:** The incidence rate of tuberculosis in the Oromia region at the zone level, between 2018 and 2022.

| Zone/Town | **TB incidence rate per 100,000 population** | | | | | |
| --- | --- | --- | --- | --- | --- | --- |
| 2018 | 2019 | 2020 | 2021 | 2022 | Total |
| Adama Town | 103.64 | 141.59 | 96.88 | 111.72 | 135.48 | 589.31 |
| Ambo Town | 124.83 | 175.27 | 114.06 | 149.61 | 207.53 | 771.30 |
| Arsi | 103.05 | 96.88 | 83.13 | 88.61 | 92.67 | 464.33 |
| Asela Town | 126.77 | 132.98 | 119.30 | 96.89 | 160.63 | 636.57 |
| Bale | 124.30 | 119.79 | 97.85 | 111.67 | 110.50 | 564.11 |
| Batu Town | 167.55 | 136.45 | 105.24 | 97.65 | 159.44 | 666.33 |
| Bishan Guracha Town | 214.02 | 70.96 | 46.61 | 55.05 | 89.17 | 475.82 |
| Bishoftu Town | 108.79 | 104.99 | 87.30 | 96.20 | 106.24 | 503.52 |
| Borena | 119.45 | 153.22 | 136.64 | 214.53 | 225.63 | 849.46 |
| Buno Bedele | 79.10 | 87.21 | 97.85 | 87.96 | 73.27 | 425.39 |
| Burayu Town | 146.45 | 133.27 | 99.00 | 118.57 | 153.36 | 650.64 |
| Dukem Town | 262.82 | 497.30 | 470.39 | 424.94 | 414.25 | 2069.70 |
| East Bale | 114.16 | 117.85 | 119.53 | 143.19 | 153.28 | 648.01 |
| East Harerge | 102.40 | 113.20 | 103.44 | 122.33 | 119.30 | 560.67 |
| East Shewa | 104.21 | 102.71 | 92.77 | 93.78 | 83.63 | 477.10 |
| East Wollega | 79.15 | 82.17 | 76.07 | 59.95 | 43.47 | 340.80 |
| Finfinne Surrounding | 99.61 | 107.49 | 82.92 | 84.11 | 89.44 | 463.56 |
| Gelan Town | 72.92 | 146.34 | 85.50 | 64.48 | 95.65 | 464.88 |
| Guji | 187.75 | 195.93 | 182.90 | 202.91 | 226.38 | 995.87 |
| Holeta Town | 112.74 | 150.18 | 103.87 | 105.80 | 167.95 | 640.54 |
| Horo Guduru Wollega | 66.02 | 75.14 | 65.02 | 55.29 | 43.25 | 304.71 |
| Ilubabor | 79.43 | 92.91 | 95.95 | 88.81 | 59.77 | 416.86 |
| Jimma | 77.41 | 85.08 | 84.50 | 84.64 | 73.61 | 405.24 |
| Jimma Town | 149.06 | 181.26 | 145.68 | 179.01 | 194.90 | 849.91 |
| Kelem Wollega | 117.11 | 106.34 | 98.58 | 96.64 | 74.40 | 493.07 |
| Lege Tafo Town | 215.25 | 211.00 | 177.21 | 190.34 | 174.92 | 968.71 |
| Mojo Town | 186.49 | 148.89 | 112.40 | 120.21 | 171.60 | 739.59 |
| Nekemte Town | 123.90 | 121.26 | 73.86 | 88.08 | 115.47 | 522.57 |
| North Shewa | 72.03 | 72.25 | 51.52 | 60.54 | 51.84 | 308.19 |
| Robe Town | 109.80 | 108.02 | 107.48 | 75.25 | 138.62 | 539.17 |
| Sebeta Town | 73.16 | 77.25 | 62.91 | 52.84 | 73.48 | 339.64 |
| Shashemene Town | 292.28 | 261.33 | 263.12 | 241.29 | 305.71 | 1363.74 |
| South West Shewa | 95.21 | 99.16 | 89.17 | 93.84 | 70.33 | 447.71 |
| Sululta Town | 269.18 | 224.67 | 158.14 | 262.18 | 284.76 | 1198.93 |
| Weliso Town | 122.22 | 208.38 | 192.60 | 129.41 | 133.76 | 786.37 |
| West Arsi | 107.77 | 101.71 | 86.38 | 97.58 | 89.26 | 482.70 |
| West Guji | 165.71 | 179.59 | 196.60 | 234.11 | 201.39 | 977.40 |
| West Harerge | 100.82 | 94.02 | 106.29 | 128.46 | 143.39 | 572.99 |
| West Shewa | 77.73 | 81.06 | 73.16 | 69.60 | 52.45 | 353.99 |
| West Wollega | 89.29 | 91.04 | 75.35 | 78.03 | 54.11 | 387.83 |
| Oromia | 103.21 | 106.19 | 96.93 | 105.49 | 100.49 | 512.13 |
